# Supplementary material for: Probing instructions for expression regulation in gene nucleotide compositions
Source: PLOS journal article supplement (doi:10.1371/journal.pcbi.1005921), 2018-01-02

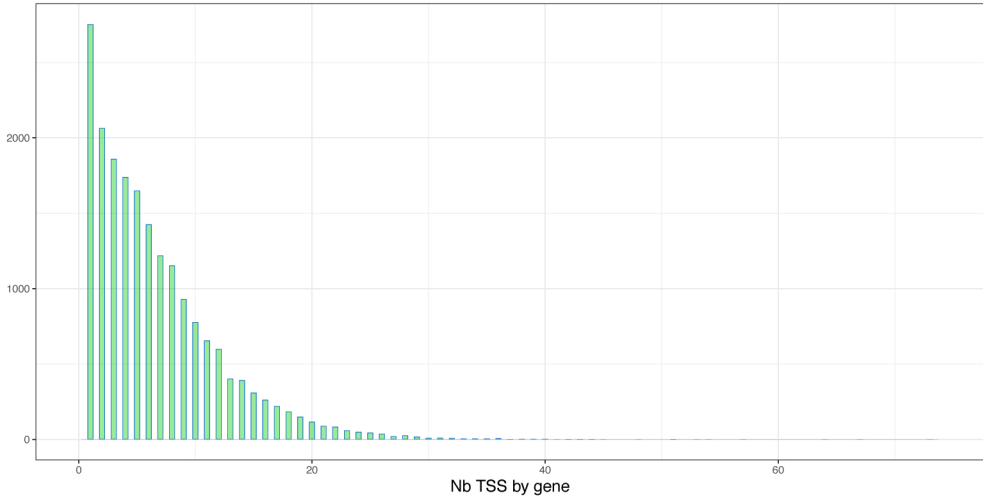

Supplement: S3 (10.1371/journal.pcbi.1005921.s003) [file journal.pcbi.1005921.s003]
